# Supplementary material for: Cardiac Differentiation of Adipose Tissue-Derived Stem Cells Is Driven by BMP4 and bFGF but Counteracted by 5-Azacytidine and Valproic Acid
Source: PubMed Central journal article supplement (PMC6947007; doi:10.22074/cellj.2020.6582), 2019-12-15
Supplement: Cell-J-22-273-s01.pdf [file Cell-J-22-273-s01.pdf]

## Supplementary Information for

# Cardiac Differentiation of Adipose Tissue-Derived Stem Cells Is Driven by BMP4 and bFGF but Counteracted by 5-Azacytidine and Valproic Acid

Sanaz Hasani, M.Sc.<sup>1,2</sup>, Arash Javeri, M.D., Ph.D.<sup>1</sup>, Asadollah Asadi, Ph.D.<sup>2</sup>, Masoumeh Fakhri Taha, Ph.D.<sup>1\*</sup>

1. Department of Stem Cells and Regenerative Medicine, Institute for Medical Biotechnology, National Institute of Genetic Engineering and Biotechnology (NIGEB), Tehran, Iran

2. Department of Biology, Faculty of Science, University of Mohaghegh Ardabili, Ardabil, Iran

*\*Corresponding Address: P.O.Box: 14965-161, Department of Stem Cells and Regenerative Medicine, Institute for Medical Biotechnology, National Institute of Genetic Engineering and Biotechnology (NIGEB), Tehran, Iran  
Email: mftaha@nigeb.ac.ir*

**Table S1:** Primers used for reverse transcription-polymerase chain reaction (RT-PCR) and quantitative real-time PCR

| Gene                | Forward                 | Reverse                 | Size (bp) | Accession |
|---------------------|-------------------------|-------------------------|-----------|-----------|
| <i>ACTB</i>         | CCTGGGCATGGAGTCTCTGT    | ATCTCCTTCTGCATCCTGTCTG  | 153       | NM_001101 |
| <i>B2M</i>          | TCCAGCGTACTCCAAAGATTCA  | GTCAACTTCAATGTCGGATGGAT | 113       | NM_004048 |
| <i>OCT4A</i>        | GATGTGGTCCGAGTGTGGTT    | AAGGGACCGAGGAGTACAGT    | 202       | NM_002701 |
| <i>NANOG</i>        | GAAGCATCCGACTGTAAAGAATC | TGGTGGAAGAATCAGGGCTGT   | 169       | NM_024865 |
| <i>SOX2</i>         | AGAACCCCAAGATGCACAAC    | TCCTTCTTCATGAGCGTCTTG   | 184       | NM_003106 |
| <i>GSC</i>          | GAAAGTGGAGGTCTGGTTTAA   | TACCTTCCTCTTCCCTCTTCT   | 143       | NM_173849 |
| Brachyury/ <i>T</i> | CTCCAACCTATTCTGACAAC    | ACTGACTGGAGCTGGTAGGT    | 141       | NM_003181 |
| <i>NES</i>          | ACCTCAAGATGTCCCTCAGC    | TCAGGACTGGGAGCAAAGATC   | 186       | NM_006617 |
| <i>GATA4</i>        | CTGTGCCCGTAGTGAGATGA    | ACCAGCAGCTCCTTCAGGCA    | 141       | NM_002052 |
| <i>MEF2C</i>        | AGACCACCTGTGTTACCTGCA   | AGATTGTGTGCTGTTCCACCT   | 203       | NM_002397 |
| <i>TBX5</i>         | CCCGTCACAGACCATTATTATC  | AAGGCTGGAAGGCGGATGTTT   | 143       | NM_000192 |
| <i>MLC2A</i>        | GGTCTGTCCCATTGAGCTTCT   | AGCTGGGGAAGGTGAGTGT     | 120       | NM_021223 |
| <i>MLC2V</i>        | GGTCCGCTCCCTTAAGTTTCT   | CTTGGGCGAGTGAACGTGAA    | 118       | NM_000432 |
| <i>ANF</i>          | CGCTTCTTCATTCGGCTCAC    | GGATTTCAGAATTTGCTGGACC  | 97        | NM_006172 |
